# Supplementary material
Source: publisher site journal article supplement (https://www.dovepress.com/get_supplementary_file.php?f=307197.docx)
Supplement: Supplementary file 1 [file get_supplementary_file.php]

**Supplementary Data**

**Table S1** Genes associated with innate and adapted immunity, lymphocyte trafficking, differentiation, and activation, and cytokine signaling are systemically (peripheral blood) and locally (anterior ethmoid sinus) upregulated in patients with CRSwNP compared to controls.

| **Gene** | **Gene Expression Ratio (CRSwNP:Control)**  **Top: Ethmoid Sinus**  **Bottom: Peripheral Blood** | ***p*-value** |
| --- | --- | --- |
| ***ARHGDIB*** | 1.21  2.73 | <0.0001  <0.01 |
| ***ATG5*** | 1.37  1.52 | <0.0001  <0.0001 |
| ***CASP2*** | 1.27  1.35 | <0.0001  <0.0001 |
| ***CCL5*** | 1.43  2.12 | <0.003  <0.02 |
| ***CD3D*** | 1.46  3.05 | <0.006  <0.01 |
| ***CD4*** | 1.21  2.98 | <0.0006  <0.01 |
| ***CTNNB1*** | 1.35  1.47 | <0.0001  <0.0008 |
| ***CUL9*** | 1.40  1.35 | <0.004  <0.01 |
| ***GZMK*** | 1.55  4.04 | <0.03  <0.03 |
| ***HRAS*** | 1.39  1.49 | <0.0009  <0.0001 |
| ***IL21R*** | 1.80  2.45 | <0.0001  <0.04 |
| ***IL2RG*** | 1.32  2.84 | <0.0001  <0.02 |
| ***IRAK1*** | 1.10  1.39 | <0.02  <0.003 |
| ***JAK1*** | 1.81  1.78 | <0.0001  <0.0003 |
| ***KIT*** | 1.50  2.29 | <0.02  <0.0001 |
| ***KLRK1*** | 1.47  2.02 | <0.02  <0.02 |
| ***LEF1*** | 1.42  1.90 | <0.01  <0.03 |
| ***LTB4R*** | 1.39  1.84 | <0.04  <0.03 |
| ***PLAUR*** | 2.79  3.67 | <0.0001  <0.03 |
| ***PSMB5*** | 1.20  1.29 | <0.003  <0.04 |
| ***STAT5B*** | 1.33  1.93 | <0.03  <0.002 |
| ***TICAM1*** | 1.15  1.48 | <0.04  <0.003 |
| ***TRAF6*** | 1.56  1.27 | <0.0001  <0.002 |

**Abbreviations:** CRSwNP: chronic rhinosinusitis with nasal polyps;*ARHGDIB*: Rho GDP dissociation inhibitor beta; *ATG5*: ATG5 autophagy related 5 homolog (S. cerevisiae); *CASP2*: caspase 2; *CCL5*: chemokine (C-C motif) ligand 5; *CD3D*: cluster of differentiation 3 delta; *CD4*: cluster of differentiation 4; *CTNNB1*: beta 1 catenin; *CUL9*: cullin 9; *GZMK*: granzyme K; *HRAS*: v-Ha-ras Harvey rat sarcoma viral oncogene homolog; *IL21R*: interleukin 21 receptor; *IL2RG*: interleukin 2 receptor, gamma; *IRAK1*: interleukin-1 receptor-associated kinase 1; *JAK1*: Janus kinase 1; *KIT*: KIT proto-oncogene, receptor tyrosine kinase; *LEF1*: lymphoid enhancer binding factor 1; *LTB4R*: leukotriene B4 receptor; *PLAUR*: plasminogen activator, urokinase receptor; *PSMB5*:proteasome 20S subunit beta 5; *STAT5B*: signal transducer and activator of transcription 5B; *TICAM1*:Toll-like receptor adaptor molecule 1; *TRAF6*: TNF receptor associated factor 6
